# Supplementary material
Source: PubMed Central journal article supplement (PMC3843951)
Supplement: NIHMS498274-supplement-1.pdf [file NIHMS498274-supplement-1.pdf]

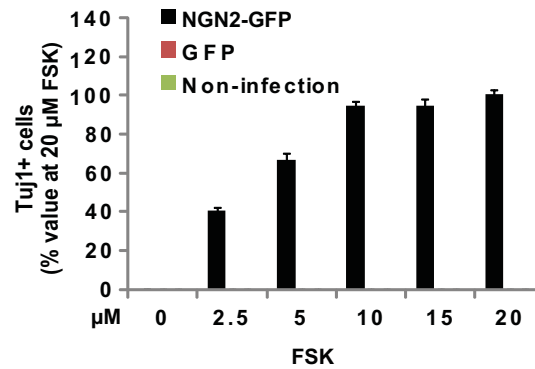

**Supplementary Figure S1.** Neuronal conversion in response to different dosage of forskolin (FSK). Tuj1<sup>+</sup> cells were examined 5 days post treatment of IMR-90 fibroblasts (means ± s.e.m., n=20 randomly selected 20x fields from triplicate samples). Tuj1<sup>+</sup> cells were undetectable in non-infected or control virus-infected fibroblasts under the same culture condition.

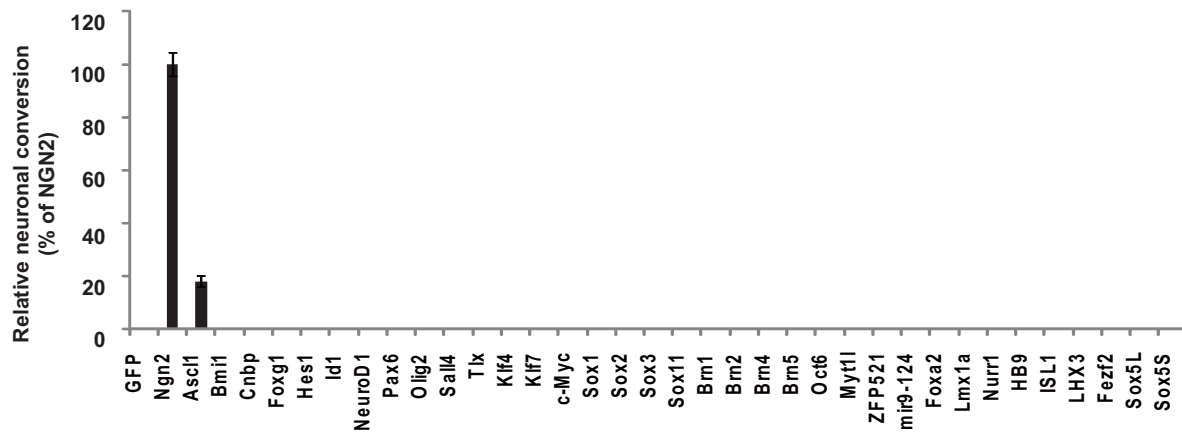

**Supplementary Figure S2.** FSK and DM uniquely synergize with NGN2 to reprogram human fetal fibroblasts to neurons. Tuj1<sup>+</sup> cells from IMR-90 fibroblasts were quantified after 5 days of incubation with FSK and DM (means ± s.e.m., n=20 randomly selected 20x fields from triplicate sam) |<sup>^</sup>•<sup>Ⓓ</sup>

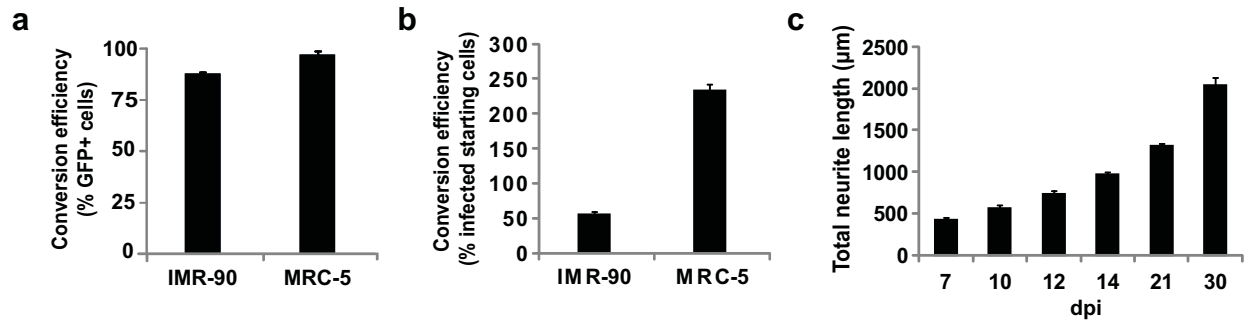

**Supplementary Figure S3.** Small molecule-mediated efficient conversion of human fetal fibroblasts by NGN2. **(a-b)** Conversion efficiency at 14 dpi. Total number of Tuj1<sup>+</sup> cells was normalized to that of either NGN2-expressing (GFP<sup>+</sup>) or infected starting cells (means  $\pm$  s.e.m., n=3). **(c)** Neurite growth of converted neurons over time (means  $\pm$  s.e.m., n=10 cells).

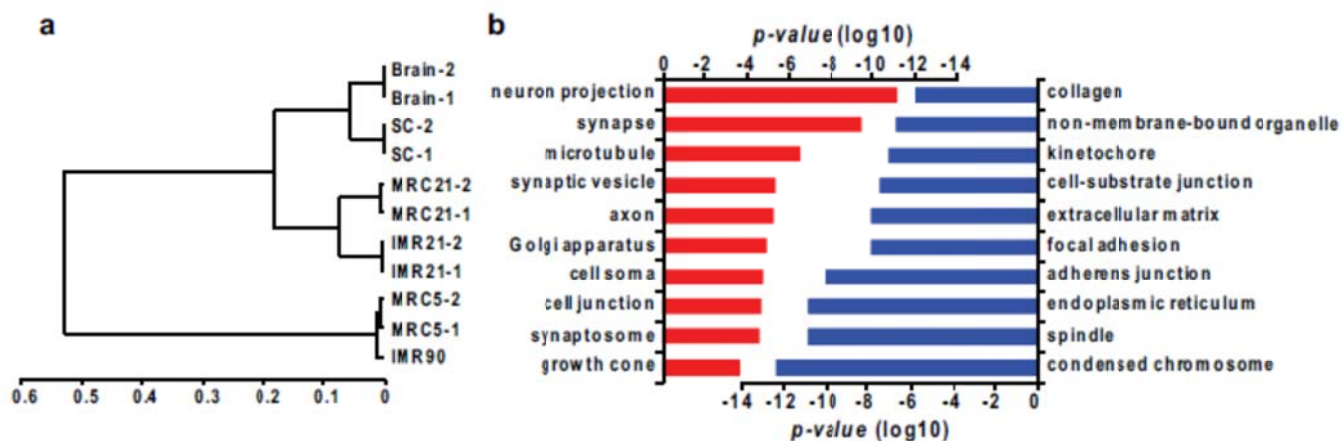

**Supplementary Figure S4.** Gene expression analysis of induced neurons by NGN2. **(a)** Hierarchical clustering of global gene expression. MRC21 and IMR21 represent reprogrammed cells from MRC-5 and IMR-90 fibroblasts in duplicate at 21 dpi, respectively. IMR-90 and MRC-5 are non-reprogrammed human fetal lung fibroblasts. Adult human brain and spinal cord (SC) were used as controls. **(b)** Top ten highly enriched gene sets by DAVID ontology analysis. Red and blue bars indicate significantly up-regulated and down-regulated genes, respectively.

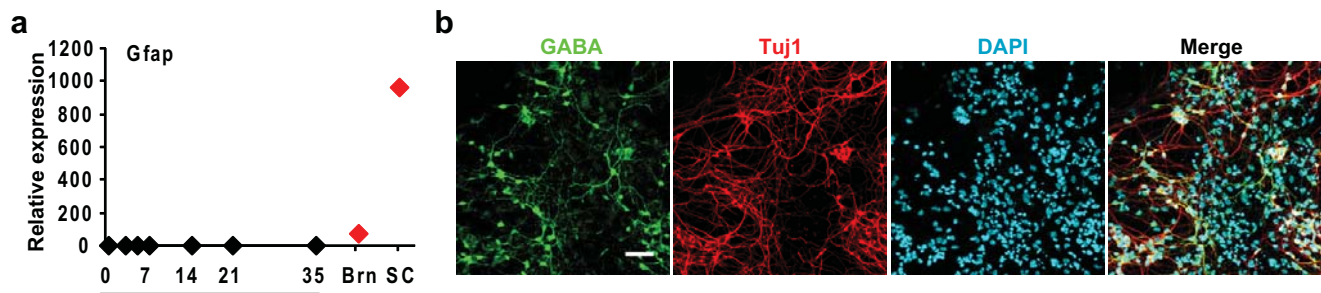

**Supplementary Figure S5.** Gene expression analysis of converted neurons from human fetal fibroblasts. **(a)** qRT-PCR analysis of a marker for glia during reprogramming (n=3 independent samples at the indicated time points). Samples from adult human brain (Brn) or spinal cord (SC) were used as controls (n=1). **(b)** GABA expression in neurons differentiated from human neural stem cells. This was a positive control for GABA antibody used in **Figure 1o**. Scale, 50  $\mu$ m.

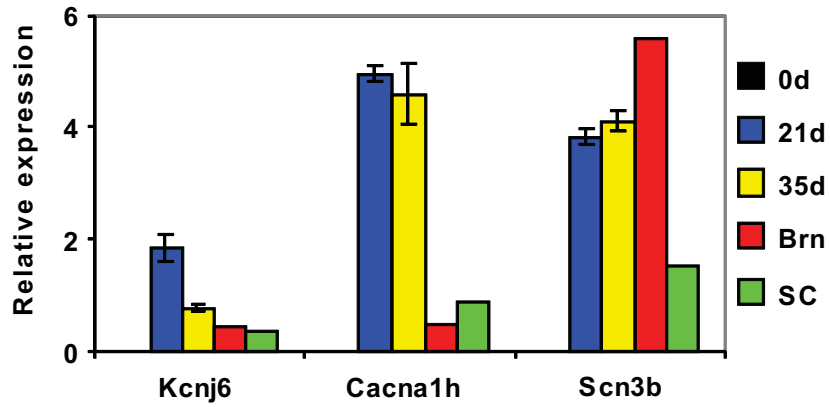

**Supplementary Figure S6.** Channels for potassium (Kcnj6), calcium (Cacna1h) and sodium (Scn3b) were induced in converted neurons (means  $\pm$  s.e.m.,  $n=3$ ). Samples from adult human brain (Brn) and spinal cord (SC) were used as controls ( $n=1$ ).

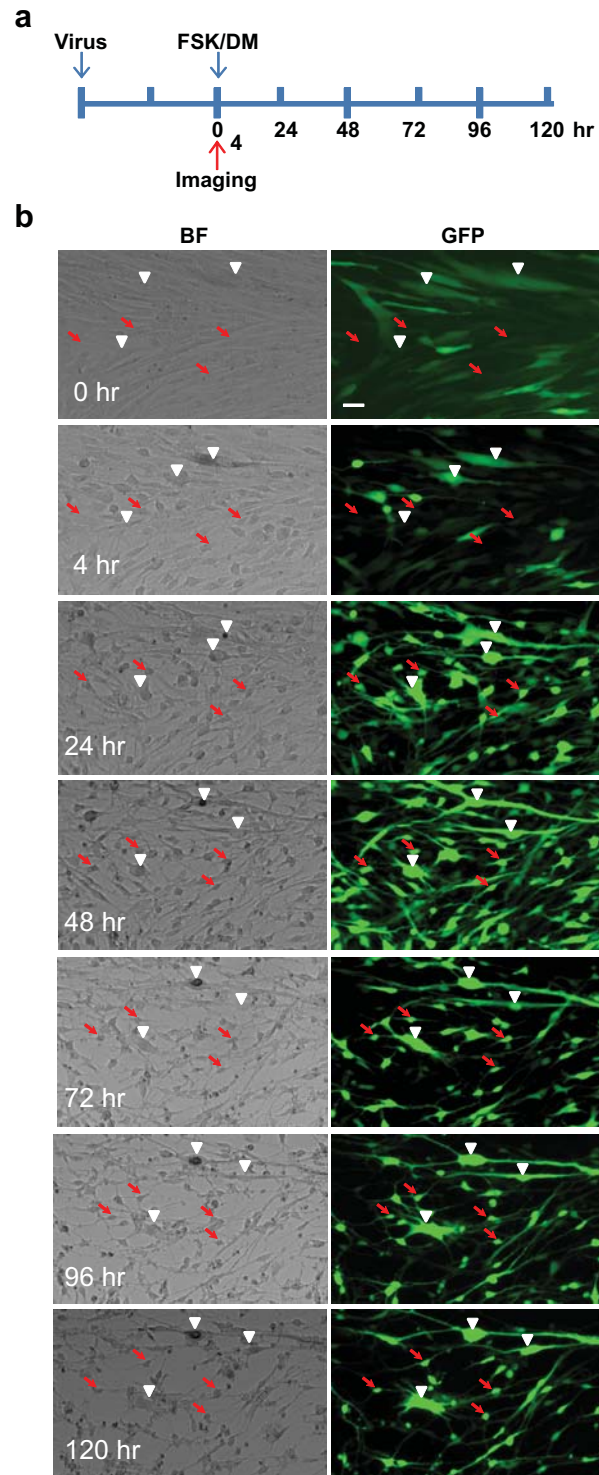

**Supplementary Figure S7.** Small molecules enable NGN2 to induce rapid morphological change of fibroblasts into neuron-like cells. (a) Experimental design. (b) Time-lapse live cell images taken at the indicated time points after treatment with FSK/DM. The same imaging fields are indicated by white arrowheads, whereas red arrows point to cells rapidly changing shape into neuron-like morphology without going through cell divisions. Scale, 50  $\mu$ m.

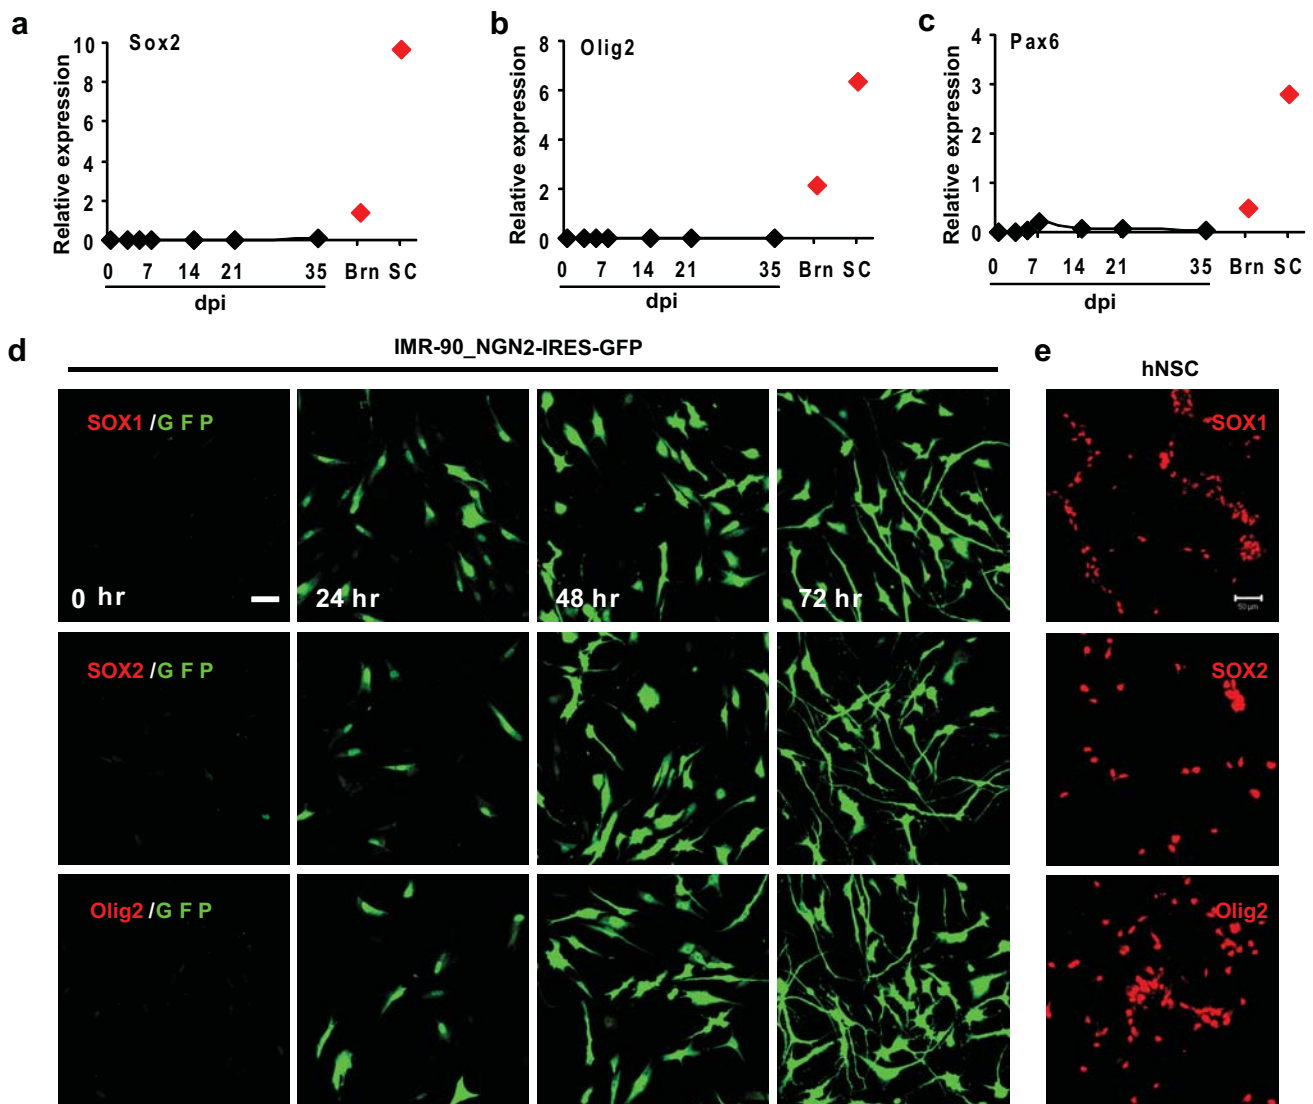

**Supplementary Figure S8.** Neuronal conversion from human fibroblasts does not pass through a progenitor state. **(a-c)** qRT-PCR analysis of markers for neural progenitors (means  $\pm$  s.e.m.,  $n=3$  independent samples at the indicated time points). Samples from adult human brain (Brn) or spinal cord (SC) were used as controls ( $n=1$ ). **(d)** Markers for neural progenitors were not detected during the reprogramming process. **(e)** Antibody specificity was examined in human neural stem cells (hNSC). Scales, 50  $\mu$ m.



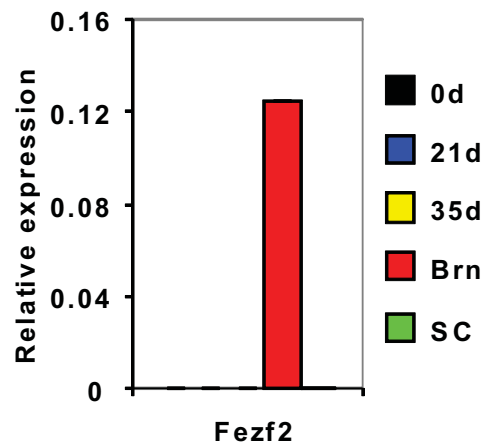

**Supplementary Figure S9.** Fezf2, a marker for upper motor neurons, was not detected in induced neurons by qRT-PCR (means  $\pm$  s.e.m., n=3). Samples from adult human brain (Brn) and spinal cord (SC) were used as controls (n=1).

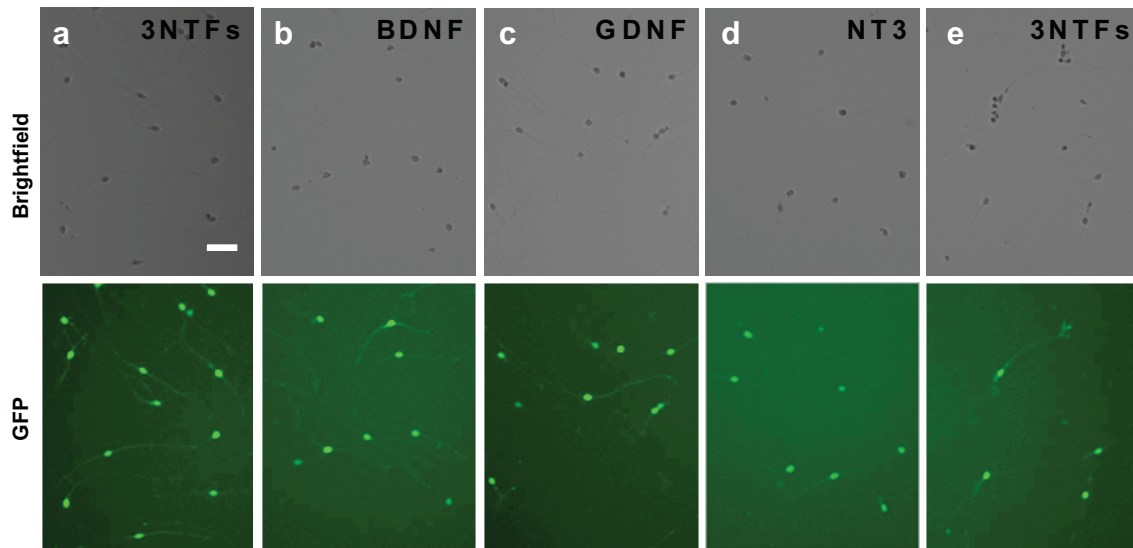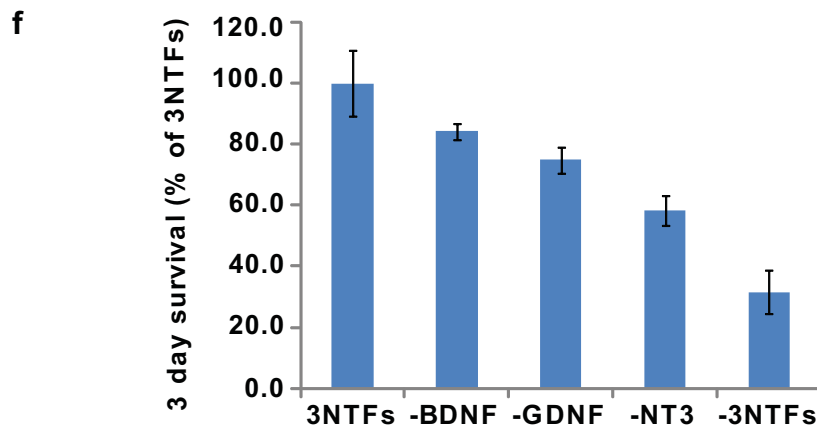

**Supplementary Figure S10.** NGN2-induced neurons depend on neurotrophic factors for long-term survival. (a-f) Withdrawing any of the indicated neurotrophic factors resulted in a loss of purified converted neurons. Surviving GFP<sup>+</sup> cells were counted 3 days after removal of the indicated factors from triplicate samples (means  $\pm$  s.e.m.). Scale, 50  $\mu$ m.

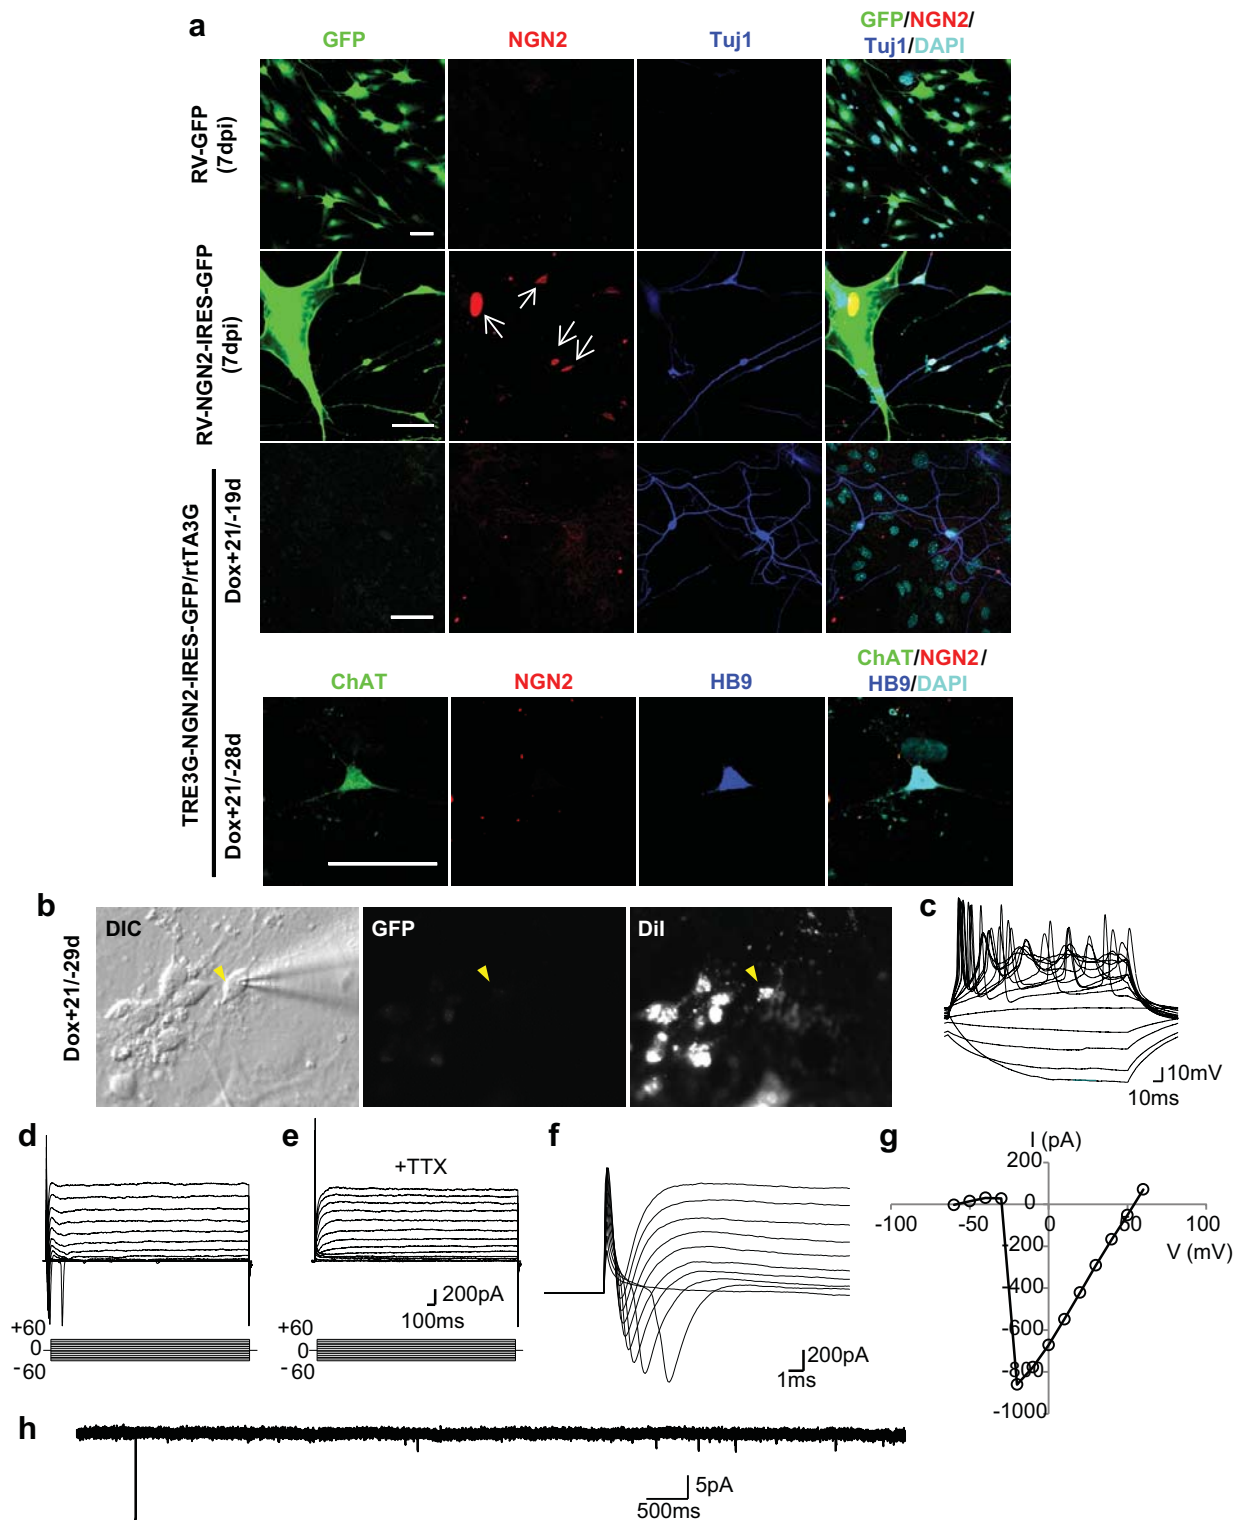

**Supplementary Figure S11.** Reprogrammed neurons are functionally mature after downregulation of exogenous NGN2. **(a)** Immunocytochemistry analysis showing hiCNs from MRC-5 fibroblasts express ChAT and HB9 at 49 dpi after turning off NGN2 expression by Dox withdrawal at 21 dpi (Dox+21/-28d). Lack of NGN2 expression was confirmed by staining at both 19 d and 28 d post Dox withdrawal. Antibody specificity was examined at 7 dpi using retrovirus (RV)-expressed NGN2-IRES-GFP (arrows). RV-GFP was used as a negative control. **(b)** Representative image of a patched hiCN 29 d post Dox withdrawal (Dox+21/-29d). These hiCNs were labeled at 21 dpi by Dil before plating on astrocytes-coated coverslips. **(c)** Action potentials were elicited by depolarizing current injection (-20 pA to +40 pA with 5pA interval) and resembled functionally mature neurons (n=8/8 recorded cells). **(d-e)** TTX-sensitive fast inward currents upon depolarization by voltage steps. **(f-g)** Sodium currents elicited above -30mV, with a peak current at -800 pA (n=5/7 recorded cells). **(h)** Spontaneous activity recorded from hiCNs co-cultured with mouse astrocytes (n=9/10 recorded cells). Scale, 50  $\mu$ m.

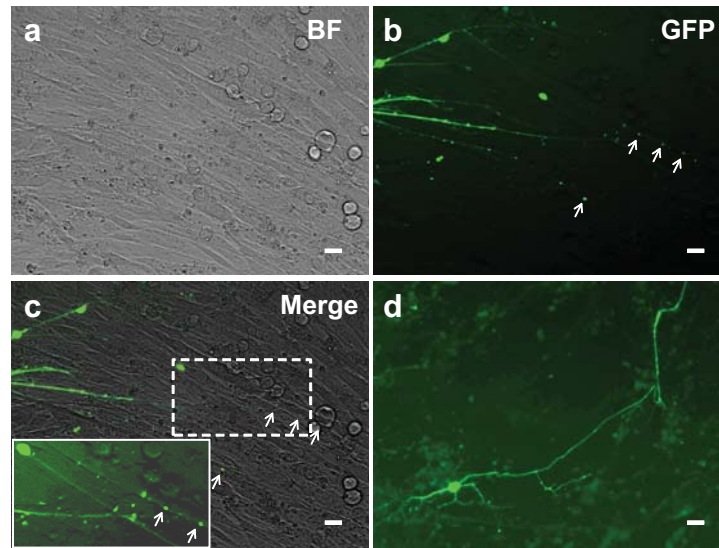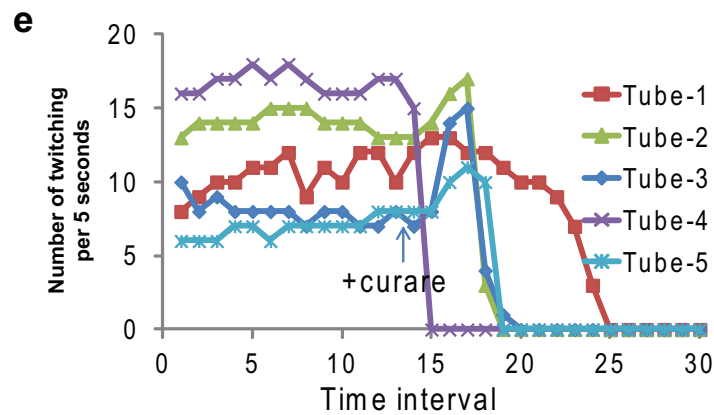

**Supplementary Figure S12. hiCNs induce curare-sensitive contractions of co-cultured myotubes.** (a-c) hiCNs extended long axons along the length of differentiated C2C12 myotubes and formed synaptic-like punctate structures (arrows). Live cell images were taken 7 days post co-culture. Scale, 50  $\mu\text{m}$ . (d) hiCNs survived over 2 weeks in myotube-co-culture even in the absence of exogenous neurotrophic factors. (e) hiCNs stimulated rhythmic myotube contractions, which were sensitive to curare treatment.

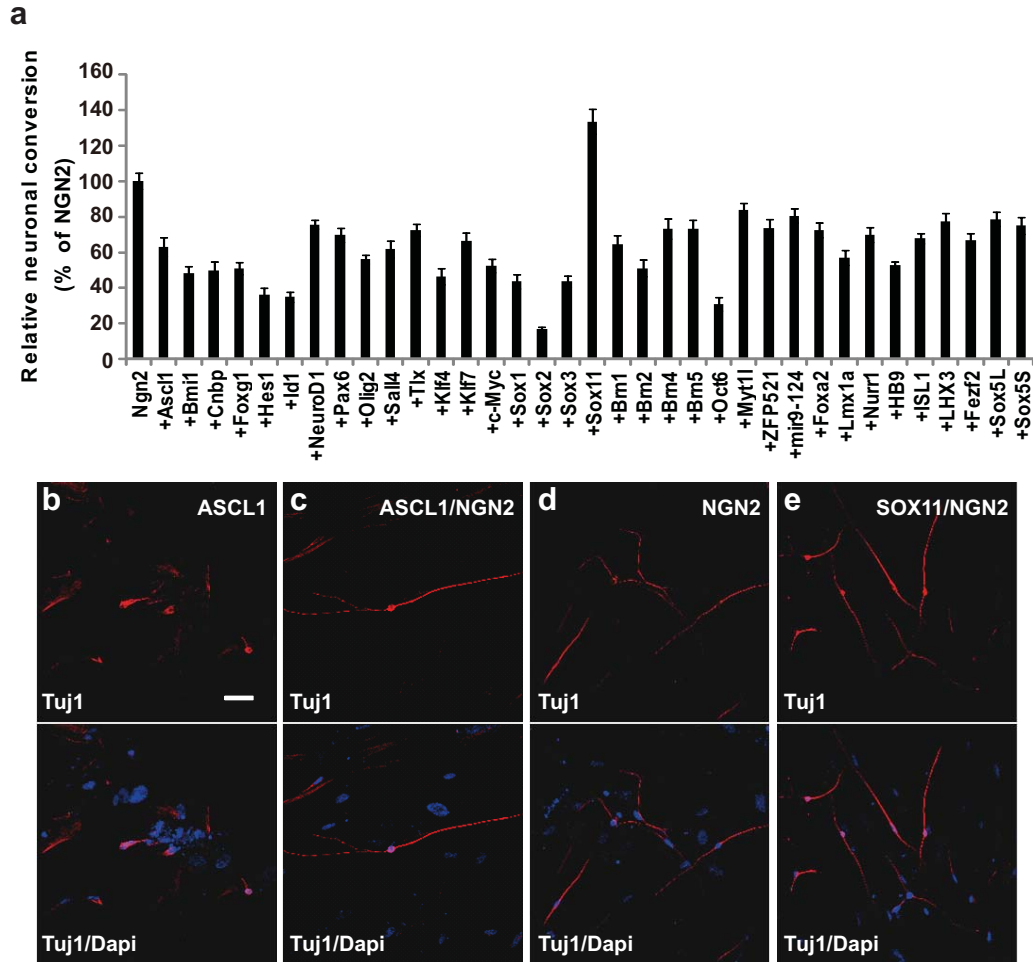

**Supplementary Figure S13.** Enhancing NGN2 activity by SOX11. (a) IMR-90 fibroblasts were transduced with virus expressing NGN2 alone or in combination with the indicated factors. Tuj1<sup>+</sup> cells were scored at 7 dpi (means  $\pm$  s.e.m., n=20 randomly selected 20x fields from triplicate samples). (b-e) Representative images of Tuj1<sup>+</sup> cells at 7 dpi. The ASCL1-induced Tuj1<sup>+</sup> cells showed very primitive unipolar morphology. Scale, 50  $\mu$ m.

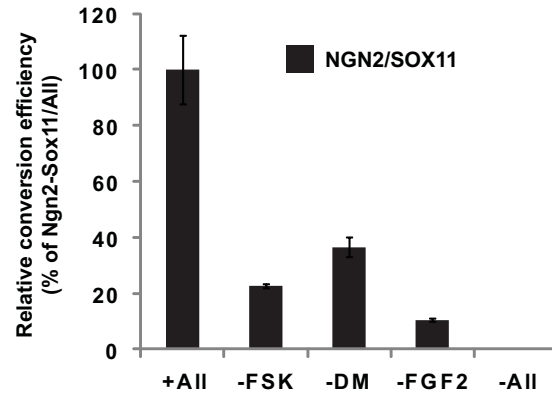

**Supplementary Figure S14.** Highly efficient neuronal conversion from adult fibroblasts requires each of the identified extrinsic factors. Tuj1<sup>+</sup> cells were counted at 21 dpi (means  $\pm$  s.e.m., n=3 wells).

**Supplementary Table S1. List of small molecules**

|   | <b>Name (Abbreviation)</b>   | <b>Company (Catalog No.)</b> | <b>Function and Involved Signaling Pathway</b>                          | <b>Solvent (concentration)</b> |
|---|------------------------------|------------------------------|-------------------------------------------------------------------------|--------------------------------|
| 1 | Forskolin (FSK)              | Sigma (F6886)                | cAMP activator, PKA pathway                                             | DMSO (10 $\mu$ M)              |
| 2 | Retinoic Acid (RA)           | Sigma (R2625)                | RA signaling pathways                                                   | DMSO (1 $\mu$ M)               |
| 3 | Valproic Acid (VPA)          | Sigma (P4543)                | HDAC inhibitor, GSK3 $\beta$ inhibitor, Notch-1 activator               | DW (1 mM)                      |
| 4 | n-Butyric Acid (NaB)         | Sigma (B-5887)               | HDAC inhibitor                                                          | DW (1 mM)                      |
| 5 | Trichostatin A (TSA)         | Sigma (T8552)                | HDAC inhibitor                                                          | DW (0.1 $\mu$ M)               |
| 6 | SB431542 (SB)                | Sigma (S4317)                | TGF- $\beta$ R Inhibitor, Activin/TGF- $\beta$ /SMAD signaling pathways | DMSO (10 $\mu$ M)              |
| 7 | Dorsomorphin Compound C (DM) | EMD Chemicals (171260)       | BMP inhibitor, BMP/SMAD signaling pathways                              | DMSO (1 $\mu$ M)               |

**Supplementary Table S2. List of genes examined for reprogramming human fibroblasts into neurons**

|    | <b>Gene Name</b> | <b>Gene ID</b> |
|----|------------------|----------------|
| 1  | Ngn2             | 63973          |
| 2  | Ascl1            | 429            |
| 3  | Bmi1             | 12151          |
| 4  | Cnbp             | 12785          |
| 5  | Foxg1            | 2290           |
| 6  | Hes1             | 15205          |
| 7  | Id1              | 15901          |
| 8  | NeuroD1          | 4760           |
| 9  | Pax6             | 5080           |
| 10 | Olig2            | 10215          |
| 11 | Sall4            | 99377          |
| 12 | Tlx              | 21907          |
| 13 | Klf4             | 9314           |
| 14 | Klf7             | 93691          |
| 15 | c-Myc            | 4609           |
| 16 | Sox1             | 20664          |
| 17 | Sox2             | 6657           |
| 18 | Sox3             | 20675          |
| 19 | Sox11            | 20666          |
| 20 | Brn1             | 18993          |
| 21 | Brn2             | 5454           |
| 22 | Brn4             | 5456           |
| 23 | Brn5             | 19009          |
| 24 | Oct6             | 18991          |
| 25 | Myt1l            | 17933          |



|    |              |                        |
|----|--------------|------------------------|
| 26 | ZNF521       | 25925                  |
| 27 | mir9 cluster | 407046, 407047, 407051 |
| 28 | mir124       | 406907                 |
| 29 | Foxa2        | 15376                  |
| 30 | Lmx1a        | 110648                 |
| 31 | Nurr1        | 18227                  |
| 32 | HB9          | 3110                   |
| 33 | ISL1         | 3670                   |
| 34 | LHX3         | 8022                   |
| 35 | Fezf2        | 55079                  |
| 36 | Sox5L        | 6660                   |
| 37 | Sox5S        | 6660                   |

**Supplementary Table S3. Sources of examined human fibroblasts**

|   | <b>Name</b> | <b>Repository<br/>(Catalog ID)</b> | <b>Origin</b> | <b>Age</b>            | <b>Gender</b> | <b>Disease</b>                |
|---|-------------|------------------------------------|---------------|-----------------------|---------------|-------------------------------|
| 1 | IMR-90      | ATCC (CCL-186)                     | Fetal Lung    | 16 Weeks<br>Gestation | Female        | Normal                        |
| 2 | MRC-5       | ATCC (CCL-171)                     | Fetal Lung    | 14 Weeks<br>Gestation | Male          | Normal                        |
| 3 | GM05565     | Coriell                            | Skin          | 3 Years               | Male          | Apparently Healthy            |
| 4 | GM03813     | Coriell                            | Skin          | 3 Years               | Male          | Spinal Muscular Atrophy       |
| 5 | GM03814     | Coriell                            | Skin          | NA <sup>a</sup>       | Female        | Apparently Healthy            |
| 6 | GM07522     | Coriell                            | Skin          | 19 Years              | Female        | Apparently Healthy            |
| 7 | ND29563     | Coriell                            | Skin          | 37 Years              | Male          | Amyotrophic Lateral Sclerosis |

**Supplementary Table S4. qRT-PCR Primers used in this study for quantitative gene expression**

| <b>Gene Name</b> | <b>Primer Sequences</b>  | <b>Sense/Antisense</b> |
|------------------|--------------------------|------------------------|
| Cacna1h          | TGACCTTCGGCAACTATGTG     | Sense                  |
|                  | GGAGTTCTCTGAGCTTGTGG     | Antisense              |
| ChAT             | GCACTCCAGCTCCTTCAC       | Sense                  |
|                  | CACTGCACCAGGACGATG       | Antisense              |
| Fezf2            | GGTACTGAAGGAAACTCGGC     | Sense                  |
|                  | CGGGTGAGATTATAGTGAGCG    | Antisense              |
| GFAP             | GTGTCAGAAGGCCACCTCAAG    | Sense                  |
|                  | TGGACTCCTTAATGACCTCTCCAT | Antisense              |
| HB9              | GCACCAGTTCAAGCTCAAC      | Sense                  |
|                  | GCTGCGTTTCCATTTTCATCC    | Antisense              |
| HOXA5            | GCAAGCTGCACATAAGTCATG    | Sense                  |
|                  | AGGTAACGGTTGAAGTGG AAC   | Antisense              |
| HOXA6            | GTACACGAGCCCGGTTTAC      | Sense                  |
|                  | CAGGTAGCGGTTGAAGTGG      | Antisense              |
| HOXA7            | AATTTCCGCATCTACCCCTG     | Sense                  |
|                  | GTGGGCGATTTCAATGCG       | Antisense              |
| HOXA9            | AATGCTGAGAATGAGAGCGG     | Sense                  |
|                  | GGGTCTGGTGTTTTGTATAGGG   | Antisense              |
| HOXB4            | TCGTCTACCCCTGGATGC       | Sense                  |
|                  | GTGTCAGGTAGCGGTTGTAG     | Antisense              |
| HOXB6            | TGGATGCAGCGGATGAATTC     | Sense                  |
|                  | CGTCAGGTAGCGATTGTAGTG    | Antisense              |
| HOXB7            | CCTGGATGCGAAGCTCAG       | Sense                  |
|                  | CGTCAGGTAGCGATTGTAGTG    | Antisense              |
| HOXC6            | GACCAGAAAGCCAGTATCCAG    | Sense                  |
|                  | AAATTCCTTCTCCAGTTCAGG    | Antisense              |
| HOXC8            | CTAACAGTAGCGAAGGACAAGG   | Sense                  |
|                  | CTAGTTCCAAGGTCTGATACCG   | Antisense              |
| HOXC9            | AGCACAAAGAGGAGAAGGC      | Sense                  |
|                  | CGTCTGGTACTTGGTGTAGG     | Antisense              |
| HOXC10           | AAAGGAGAGGGCCAAAGC       | Sense                  |
|                  | GCGTCTGGTGTTTAGTATAGGG   | Antisense              |
| HOXC11           | ACCGGCTGCAGTATTTCTC      | Sense                  |
|                  | ACAGTCCAGTTTTCCACCG      | Antisense              |
| HOXD9            | GGCTGTTGCTGAAGGAG        | Sense                  |
|                  | CGTCTGGTATTTGGTGTAGGG    | Antisense              |
| ISL2             | CAACAGTATGGTGCCGAGTC     | Sense                  |
|                  | AGAGCTTTCGGAAGTGAATG     | Antisense              |
| Kcnj6            | GAAGTGGAGACTGAAGAGGAAG   | Sense                  |

|          |                        |           |
|----------|------------------------|-----------|
|          | GACAAGGAAAGATTGTGTTGGG | Antisense |
| endoNGN2 | TCAGACATGGACTATTGGCAG  | Sense     |
|          | GGGACAGGAAAGGGAACC     | Antisense |
| vNGN2    | TCAGACATGGACTATTGGCAG  | Sense     |
|          | ACACCGGCCTTATTCCAAG    | Antisense |
| Olig2    | AGCTCCTCAAATCGCATCC    | Sense     |
|          | AAAAGGTCATCGGGCTCTG    | Antisense |
| Pax6     | GCCCTCACAACACCTACAG    | Sense     |
|          | TCATAACTCCGCCATTAC     | Antisense |
| Scn3b    | GAAAGGTCTCAAAGCCGAAG   | Sense     |
|          | CACTGCTCCTGTTCTATTCCTC | Antisense |
| SMN1     | CCACACCTAAAAGAAAACCTGC | Sense     |
|          | GCAATGGTAGCTGGGTAAATG  | Antisense |
| Sox2     | CCGTTTCATCGACGAGGCTAA  | Sense     |
|          | TAATCCGGGTGCTCCTTCAT   | Antisense |
